# Supplementary material for: Comparison of petunia and calibrachoa in carotenoid pigmentation of corollas
Source: PubMed Central journal article supplement — Breed Sci. 2019 Feb 19;69(1):117–26. doi: 10.1270/jsbbs.18130 (PMC6507714; doi:10.1270/jsbbs.18130), 2019-02-19
Supplement: 69_18130_1.pdf [file 69_18130_1.pdf]

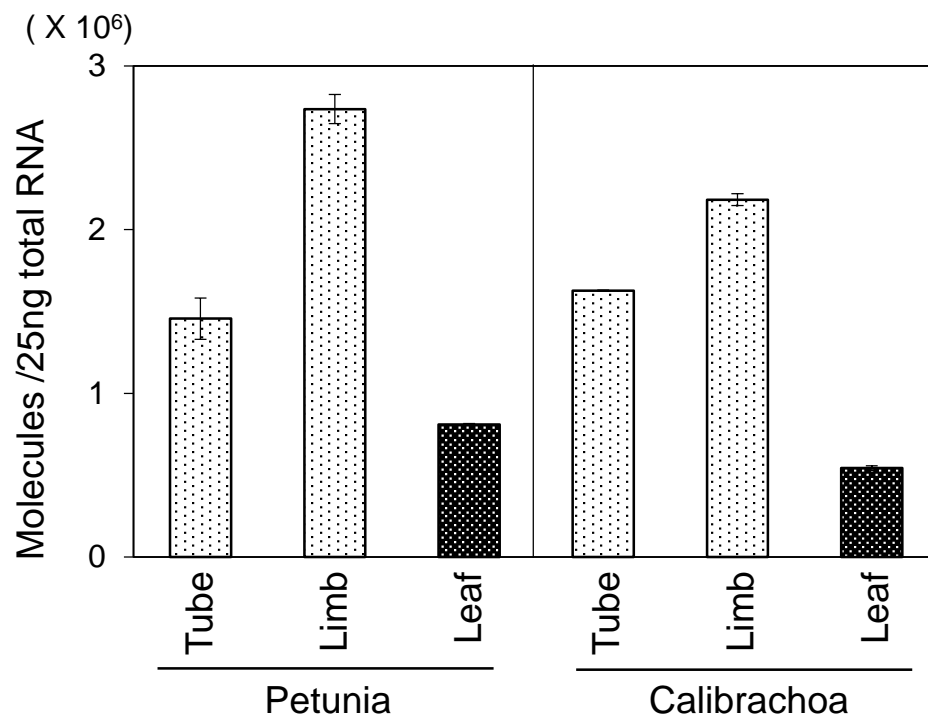

Supplemental Fig. 1. Expression analysis of *Actin* in tubes, limbs, and leaves of petunia and calibrachoa. RT-qPCR analysis were performed in triplicate; means  $\pm$  SE are shown.

|        |                                                                                                                                                                                                                                                                                                                      |
|--------|----------------------------------------------------------------------------------------------------------------------------------------------------------------------------------------------------------------------------------------------------------------------------------------------------------------------|
| PhXES  | <span style="border: 1px solid green;">MASLLQNF</span> WASPR <sup>1</sup> LAPNQDYK <sup>2</sup> SQC <sup>3</sup> VGPTR <sup>4</sup> CVASKDSTLLSSDSV <sup>5</sup> SN <sup>6</sup> GVSSIEEKEKSSP 60                                                                                                                    |
| ChXES  | <span style="border: 1px solid green;">MASLLQNF</span> WASPR <sup>1</sup> ALNQDYK <sup>2</sup> ESL <sup>3</sup> TRIRCLASRDSTLLSSDSR <sup>4</sup> VNDVSSIAEKEKSSP 60                                                                                                                                                  |
| SIPYP1 | <span style="border: 1px solid green;">MASLLHNF</span> WAVPR <sup>1</sup> FGLSPDYK <sup>2</sup> PHC <sup>3</sup> IAR <sup>4</sup> ACLANRDSTFLSSDSV <sup>5</sup> IV <sup>6</sup> NGVSSIEEKEKSS 60                                                                                                                     |
|        | ***** ** * * * * * * * * * * * * * * * * * * * * * * * * * * * * * *                                                                                                                                                                                                                                                 |
| PhXES  | I <sup>1</sup> VDV <sup>2</sup> GN <sup>3</sup> HGLTSAINEKRKEDIQ <sup>4</sup> DKLEPLWDDGYGTQ <sup>5</sup> TKDFF--AKE <sup>6</sup> ILK <sup>7</sup> PDGGPPRWFT 118                                                                                                                                                    |
| ChXES  | I <sup>1</sup> VDVEN <sup>2</sup> HGLTSAINEKRKEDSQ <sup>4</sup> DKLEPLWDDGYGTQ <sup>5</sup> IKDFF--AKK <sup>6</sup> IHS <sup>7</sup> PDGGPPRWFT 118                                                                                                                                                                  |
| SIPYP1 | I <sup>1</sup> IDV <sup>2</sup> K <sup>3</sup> NSHLAPAIKEKNKEDIQ <sup>4</sup> NKLET <sup>5</sup> LWDDGYGTQ <sup>6</sup> TKDYLEIGSE <sup>7</sup> ILK <sup>8</sup> PDGGPPRWFT 120                                                                                                                                      |
|        | * * * * * * * * * * * * * * * * * * * * * * * * * * * * * * *                                                                                                                                                                                                                                                        |
| PhXES  | PISAGP <sup>1</sup> PLEDSP <sup>2</sup> LLLFLPGMDGT <sup>3</sup> QFGLVLHEKALGKVFQ <sup>4</sup> VWCLHIPVYDRT <sup>5</sup> PFDELV <sup>6</sup> KFV 178                                                                                                                                                                 |
| ChXES  | PISAGP <sup>1</sup> P <sup>2</sup> LKDS <sup>3</sup> P <sup>4</sup> LLYLP <sup>5</sup> GDGT <sup>6</sup> GLGLVLHEKALGKVFQ <sup>7</sup> IWCLHIPVYDRT <sup>8</sup> PFDELV <sup>9</sup> KLV 178                                                                                                                         |
| SIPYP1 | PISAGP <sup>1</sup> PLEDSP <sup>2</sup> LLLFLPGMDGT <sup>3</sup> GMGLVLHEKALGKVFQ <sup>4</sup> VWCLHIPVYDRT <sup>5</sup> PFDELV <sup>6</sup> KFV 180                                                                                                                                                                 |
|        | ***** * * * * * * * * * * * * * * * * * * * * * * * * * * * * * *                                                                                                                                                                                                                                                    |
| PhXES  | E <sup>1</sup> STR <sup>2</sup> MRKHASSPNK <sup>3</sup> PIYLVGDSF <sup>4</sup> GGCLALAVAARNPK <sup>5</sup> IDLVVILANPATS <sup>6</sup> FGRSPLQ <sup>7</sup> P <sup>8</sup> LL 238                                                                                                                                     |
| ChXES  | E <sup>1</sup> RTL <sup>2</sup> MRKHASSPNK <sup>3</sup> PIYVGDSS <sup>4</sup> GGCLALAVAARNPK <sup>5</sup> IDLVVILANPATS <sup>6</sup> FGRSPLQ <sup>7</sup> P <sup>8</sup> LL 238                                                                                                                                      |
| SIPYP1 | G <sup>1</sup> R <sup>2</sup> TR <sup>3</sup> MRKHASSPNK <sup>4</sup> PIYLVGDSF <sup>5</sup> GGCLALAAHNPE <sup>6</sup> IDLVILANPATS <sup>7</sup> FDRT <sup>8</sup> Q <sup>9</sup> LQ <sup>10</sup> P <sup>11</sup> LL 240                                                                                            |
|        | * * * * * * * * * * * * * * * * * * * * * * * * * * * * * * *                                                                                                                                                                                                                                                        |
| PhXES  | PLLES <sup>1</sup> LPDEFH <sup>2</sup> VTVPYLLS <sup>3</sup> YIMGDP <sup>4</sup> MKMATVNI <sup>5</sup> DSSLPPGQ <sup>6</sup> I <sup>7</sup> I <sup>8</sup> QLA <sup>9</sup> N <sup>10</sup> LTAM <sup>11</sup> LP <sup>12</sup> DL <sup>13</sup> S <sup>14</sup> GL 298                                              |
| ChXES  | PLLES <sup>1</sup> LPDEL <sup>2</sup> H <sup>3</sup> VTVPYLLS <sup>4</sup> YIMGDP <sup>5</sup> MKAMVNI <sup>6</sup> DSSLPPGQ <sup>7</sup> I <sup>8</sup> IR <sup>9</sup> LARN <sup>10</sup> L <sup>11</sup> I <sup>12</sup> AML <sup>13</sup> P <sup>14</sup> DL <sup>15</sup> S <sup>16</sup> GL 298                |
| SIPYP1 | PLLES <sup>1</sup> LPDEFH <sup>2</sup> VTVPYLLS <sup>3</sup> FIMGDP <sup>4</sup> LK <sup>5</sup> MAMVNI <sup>6</sup> D <sup>7</sup> SML <sup>8</sup> PPGQ <sup>9</sup> I <sup>10</sup> I <sup>11</sup> QLAG <sup>12</sup> N <sup>13</sup> LD <sup>14</sup> LL <sup>15</sup> AH <sup>16</sup> LY <sup>17</sup> GL 300 |
|        | ***** * * * * * * * * * * * * * * * * * * * * * * * * * * * * * *                                                                                                                                                                                                                                                    |
| PhXES  | ADI <sup>1</sup> IPKETLLW <sup>2</sup> LKLLRSASSYSN <sup>3</sup> SRLHAVNAEVL <sup>4</sup> VLASGKNM <sup>5</sup> LPS <sup>6</sup> RDEA <sup>7</sup> QRLAKSLRN 358                                                                                                                                                     |
| ChXES  | ADI <sup>1</sup> IPKETLLW <sup>2</sup> LKLLRSASSYSN <sup>3</sup> SRLHAVNAEVL <sup>4</sup> VLASGKNM <sup>5</sup> LPS <sup>6</sup> GNEA <sup>7</sup> QRLAKSLRN 358                                                                                                                                                     |
| SIPYP1 | ADI <sup>1</sup> IPKETLLW <sup>2</sup> LKLLRSASSYSN <sup>3</sup> SRLHAVNAEVL <sup>4</sup> VIASGKNM <sup>5</sup> LPS <sup>6</sup> ENEA <sup>7</sup> QRLGNSLRN 360                                                                                                                                                     |
|        | ***** * * * * * * * * * * * * * * * * * * * * * * * * * * * * * *                                                                                                                                                                                                                                                    |
| PhXES  | CEVRY <sup>1</sup> FKDNGHTILMEDGIN <sup>2</sup> LLSVI <sup>3</sup> KY <sup>4</sup> TNKYRRSR <sup>5</sup> RHDYVMD <sup>6</sup> FLPP <sup>7</sup> SMSEFK <sup>8</sup> KI <sup>9</sup> AV <sup>10</sup> NDNR <sup>11</sup> L 418                                                                                        |
| ChXES  | CEVRY <sup>1</sup> FRHNGHTILMEDGIN <sup>2</sup> LLSVI <sup>3</sup> KY <sup>4</sup> TNKYRRSR <sup>5</sup> RHDCIM <sup>6</sup> DFLPP <sup>7</sup> SKSEFK <sup>8</sup> I <sup>9</sup> IV <sup>10</sup> NY <sup>11</sup> RM 418                                                                                          |
| SIPYP1 | CTVRY <sup>1</sup> FKDNGHTILLEDGIN <sup>2</sup> LLSVI <sup>3</sup> KATSKYRRSR <sup>4</sup> RDYVKDFLPP <sup>5</sup> SKSEFK <sup>6</sup> NAIK <sup>7</sup> NNS <sup>8</sup> W 420                                                                                                                                      |
|        | * * * * * * * * * * * * * * * * * * * * * * * * * * * * * * *                                                                                                                                                                                                                                                        |
| PhXES  | YLNL <sup>1</sup> TGSV <sup>2</sup> MLSTMEDGK <sup>3</sup> IVRGLAGV <sup>4</sup> PE <sup>5</sup> GPVLLVGYHML <sup>6</sup> MGL <sup>7</sup> EIVPLVEEYLRQ <sup>8</sup> T <sup>9</sup> N <sup>10</sup> VLLR 478                                                                                                         |
| ChXES  | YLNL <sup>1</sup> TGSV <sup>2</sup> MLSTMEDGK <sup>3</sup> IVRGLAGV <sup>4</sup> PC <sup>5</sup> GPVLFVGNHML <sup>6</sup> MGL <sup>7</sup> EIVPLVEEYLRQ <sup>8</sup> R <sup>9</sup> K <sup>10</sup> VLLR 478                                                                                                         |
| SIPYP1 | YLNI <sup>1</sup> TGPV <sup>2</sup> MLSTMENGK <sup>3</sup> IVRGLAGV <sup>4</sup> PRE <sup>5</sup> GPVLLVGYHML <sup>6</sup> MGL <sup>7</sup> EIVPLVQEYMMQ <sup>8</sup> T <sup>9</sup> K <sup>10</sup> ILLR 480                                                                                                        |
|        | *** * * * * * * * * * * * * * * * * * * * * * * * * * * * * * *                                                                                                                                                                                                                                                      |
| PhXES  | GIAHPAL <sup>1</sup> FTQ-LIDRQANDG <sup>2</sup> SFV <sup>3</sup> DMLRLYGATP <sup>4</sup> VTA <sup>5</sup> INFFKLLATK <sup>6</sup> SHVLLYPGGAREAL 537                                                                                                                                                                 |
| ChXES  | GIAHPAL <sup>1</sup> FNP-V <sup>2</sup> IDTQTDEGSF <sup>3</sup> IDLRLYGATP <sup>4</sup> VAA <sup>5</sup> INFFKLLANK <sup>6</sup> SHVLLYPGGAREAL 537                                                                                                                                                                  |
| SIPYP1 | GIAHP <sup>1</sup> S <sup>2</sup> LFTQ <sup>3</sup> L <sup>4</sup> VESRPDA-S <sup>5</sup> SFIDMLKLYGATP <sup>6</sup> VTA <sup>7</sup> SNFFKLLATK <sup>8</sup> SHVLLYPGGAREAL 539                                                                                                                                     |
|        | ***** ** * * * * * * * * * * * * * * * * * * * * * * * * * * * * * *                                                                                                                                                                                                                                                 |
| PhXES  | HRKGEEY <sup>1</sup> KVIWPEQ <sup>2</sup> PEFIRMAARFGAT <sup>3</sup> IVPFVGVGEDD <sup>4</sup> IAQLVLDYDDL <sup>5</sup> QKIPIL <sup>6</sup> SDQIR 597                                                                                                                                                                 |
| ChXES  | HRKGEEY <sup>1</sup> KVIWPER <sup>2</sup> PEFIRMAARFGAT <sup>3</sup> IVPFVGVGEDD <sup>4</sup> IAQLVLDYDDL <sup>5</sup> QKIPIL <sup>6</sup> SDQIR 597                                                                                                                                                                 |
| SIPYP1 | HRKGEEY <sup>1</sup> KVIWPDQ <sup>2</sup> PEFIRMAAKFGAT <sup>3</sup> IVPFVGVGEDD <sup>4</sup> IAQLVLDYDDL <sup>5</sup> LKSIPIL <sup>6</sup> GDRIR 599                                                                                                                                                                |
|        | ***** * * * * * * * * * * * * * * * * * * * * * * * * * * * * * *                                                                                                                                                                                                                                                    |
| PhXES  | RENERAAR <sup>1</sup> QGVTRAD <sup>2</sup> ITGEVANQ <sup>3</sup> LYIPGLLPKIPGRFY <sup>4</sup> YLF <sup>5</sup> GKPVHTKGRQDLLKDRE 657                                                                                                                                                                                 |
| ChXES  | RDNERAARM <sup>1</sup> GMVTRG <sup>2</sup> MTGEVANG <sup>3</sup> LYMPGLLPKIPGRFY <sup>4</sup> YLF <sup>5</sup> GKPVHTQGRQDLLKDRA 657                                                                                                                                                                                 |
| SIPYP1 | SENEEAARR <sup>1</sup> GLAVRAD <sup>2</sup> MDGEIANQ <sup>3</sup> LYIPGLLPKIPGRFY <sup>4</sup> FFFGKPIHTKGRQDLVKDRE 659                                                                                                                                                                                              |
|        | * * * * * * * * * * * * * * * * * * * * * * * * * * * * * * *                                                                                                                                                                                                                                                        |
| PhXES  | KARELY <sup>1</sup> LQIKSEV <sup>2</sup> QNMN <sup>3</sup> FLLK <sup>4</sup> KREEDPYRS <sup>5</sup> VIDRTTYRAF <sup>6</sup> S <sup>7</sup> T <sup>8</sup> S <sup>9</sup> FDD <sup>10</sup> I <sup>11</sup> PTDF 710                                                                                                  |
| ChXES  | KARELY <sup>1</sup> FQIRSEV <sup>2</sup> QNSLN <sup>3</sup> YLLN <sup>4</sup> KREEDPYRS <sup>5</sup> VIDRTTYRAF <sup>6</sup> S <sup>7</sup> T <sup>8</sup> S <sup>9</sup> FDD <sup>10</sup> V <sup>11</sup> PTFDY 710                                                                                                |
| SIPYP1 | KARELY <sup>1</sup> LQVSEV <sup>2</sup> QNMN <sup>3</sup> YLLK <sup>4</sup> KREEDPYRN <sup>5</sup> VIDRTMYRAF <sup>6</sup> S <sup>7</sup> T <sup>8</sup> SGD <sup>9</sup> V <sup>10</sup> PTDF 712                                                                                                                   |
|        | ***** * * * * * * * * * * * * * * * * * * * * * * * * * * * * * *                                                                                                                                                                                                                                                    |

α/β hydrolase fold

LPAT

Supplemental Fig.2. Alignment of deduced amino acid sequences of PhXES (BBB44443), ChXES (BBB44444) and SIPYP1 (XP\_004230141). Conserved amino acids are indicated with asterisks. Green boxes show chloroplast transit peptides. Pink bar shows α/β hydrolase fold domain (amino acids 132-383 in PhXES), and blue bar shows lysophospholipid acyltransferase (LPAT)-like domain (amino acids 407-679 in PhXES). Squares show divergent amino acid in PhXES.
