# Supplementary material for: Comparison of petunia and calibrachoa in carotenoid pigmentation of corollas
Source: PubMed Central journal article supplement — Breed Sci. 2019 Feb 19;69(1):117–26. doi: 10.1270/jsbbs.18130 (PMC6507714; doi:10.1270/jsbbs.18130), 2019-02-19
Supplement: 69_18130_2.pdf [file 69_18130_2.pdf]

Supplemental Table 1. Primers for RT-PCR. F1 and R1 primers were used for first PCR, and F2 and R2 primers were for second (nested) PCR

| Target gene        |    | Sequence                          |
|--------------------|----|-----------------------------------|
| <i>DXS</i>         | F1 | GGYCCWGTGDGAYGGNCAARYVTHGA        |
|                    | R1 | CCRAANCCYCCWAYDGANCCYTCYTC        |
|                    | F2 | GARCARCAYGCGNGTYACHTTYGCWGC       |
|                    | R2 | GGYTTGCARAAHCRWGCATCNGCWA         |
| <i>IPI</i>         | F1 | RAGACGYCTHATGTTYGANGAYGAATGCA     |
|                    | R1 | GDAYGGTYTTCATRTCWRHDGCTTCA        |
|                    | F2 | TGGACMAACACHTGTTGYAGCCATCC        |
| <i>GGPS</i>        | R2 | GWWCCHTTYTSVACATGATCCCACCA        |
|                    | F1 | ATGMGSTAYTCRCTTCTNGCCGNGG         |
|                    | R1 | AYYARRTCYTTTCCRGCDGTYTTHCC        |
| <i>PSY</i>         | F2 | GCYTGYGCGTGBGARATGATYCAACATGTC    |
|                    | R2 | GTMACATCNARWATRTCATCWACMACYTG     |
|                    | F1 | TGYGGTGAAGTWTGYGCWGARTATGC        |
| <i>PDS</i>         | R1 | TTRTCRGTYACYTTCWGCRAATAT          |
|                    | F2 | AYGARCTYGTGAYGGGCCWAATGC          |
|                    | R2 | TANAYCTTCTCTYCKNGCATCTTC          |
| <i>Z-ISO</i>       | F1 | AGCAAGAGAYGTTCTHGGTGGAAAG         |
|                    | R1 | TCCAYTCTTCTGCWGGTGCAAAAAC         |
|                    | F2 | MHGAGGTGTTYATTGCTATGTCAA          |
| <i>ZDS</i>         | R2 | TGTTYTTSAGTTTTYCTRTCAAACCA        |
|                    | F1 | AAAAGATTTTCATCTTGGGTTTATTTTRSTGGG |
|                    | R1 | CTTYACGACTTCAAAGCCTCACC           |
| <i>LCYB</i>        | F2 | TAGAGACAAAGGTGAGGAACCTATTGGAG     |
|                    | R2 | CCAGGCACCAAACAGATGATGTCC          |
|                    | F1 | GADTCDAGGHCDTTYATTGGTGG           |
| <i>LCYE</i>        | R1 | GYAWYCHGTDACCCARCCATTGT           |
|                    | F2 | ASGTGGRAACCAYATTGAAATGGG          |
|                    | R2 | AGCATRCANCGNGCACTVATGTTATC        |
| <i>CHYB</i>        | F1 | CTTGCCCTACTATTTGCCCCAGAAATGC      |
|                    | R1 | ACCACTATCAGGAGCAAGGTATCGTC        |
|                    | F2 | CACCAATGATCAATGCAAGCATGGTTC       |
| <i>CHYB/CYP97A</i> | R2 | GACCATCTATAGCAGTGGTATTGAAAGGC     |
|                    | F1 | CCWAARYTSATNTGGCCHAAAYAATTA       |
|                    | R1 | CCNCCCATHGGGRATMACACA             |
| <i>CHYE/CYP97C</i> | F2 | TGGTGTGGGKKGATGARTTTGA            |
|                    | R2 | YMAGATGKGAATCBCKCCARTCCAT         |
|                    | F1 | AGARGATTWTRTNAARGCYGGTGG          |
| <i>ZEP</i>         | R1 | SCARRARTTTYCCHGARGCTGC            |
|                    | F2 | TWATYGGTTGTGGYCTGCTGG             |
|                    | R2 | WGCRACAGTARCAAGCCTGCA             |
| <i>CCD1</i>        | F1 | TCKASYTTKGGRTYACTTCHATGGC         |
|                    | R1 | ACTTCTTCBARYTCCTTDGGTCC           |
|                    | F2 | GRTTYCNTGGCAAATGGAGGG             |
| <i>CCD4</i>        | R2 | GRACRAACATGTANGCCATHCCAAA         |
|                    | F1 | GCGAGCTGAATTATCTGCTCGTATTGCTTC    |
|                    | R1 | CAACAGATAAAAGGTCCATGTGAGCACTGC    |
| <i>NCED</i>        | F2 | GCTCAAAAATGGTTTGTCTAAATTGGGTGT    |
|                    | R2 | CGCTATAAGCATTGTCATGAGGTCATCAGC    |
|                    | F1 | CTTTGGACGGCAAGGCCAAGGGC           |
| <i>XES</i>         | R1 | TCCCTTTGCTTCACTTTTCATGTATAAACCG   |
|                    | F2 | ATCGGGTCTTTTGCAGATGTGCTGAGAG      |
|                    | R2 | TCGTATGAATGGTTGCTCCAGTAGTCATGC    |
| <i>Actin</i>       | F1 | TTRGAAGCHATTGATWTDGRWGTGCTGA      |
|                    | R1 | TCTTCCACCAACHCKTCCNGGATG          |
|                    | F2 | TGGTTGAYGGYRYYTCTGGNAMYTGGTA      |
| <i>Actin</i>       | R2 | GCCATGCWCCCHCCTGWCCCA             |
|                    | F1 | TAYCAYMRTTYGAYGGNGAYGGNATG        |
|                    | R1 | TANCGNGGNAARNACNCCNAAYCT          |
| <i>Actin</i>       | F1 | CARTWYCTMCCNMGBGNCCYTACCA         |
|                    | R1 | AAHCCNNGMACHTYRAACCAYTTCAT        |
|                    | F2 | CCAYYMTTYGACGGNGAYGGNATGCT        |
| <i>Actin</i>       | R2 | GGRTCNRYYTTNNGGMTGMGCHGTCAT       |
|                    | F1 | CAYCAYTNTTYGAYGGHGAYGGNATG        |
|                    | R1 | TCCCAHGCRTTCCANARATGRAARC         |
| <i>Actin</i>       | F2 | YCCNAARSCNATHGGNGARCTNCAYGG       |
|                    | R2 | ATHGCGAARTCRTGVAYCATHGTHGG        |
|                    | F1 | TTTTTHATGGGHRATCCDNTKAAGATGGC     |
| <i>Actin</i>       | R1 | CCAAAYGGYACWATWGTNGCHCCAAA        |
|                    | F2 | TCCCGBMTYCATKCTGTWMAWGCTGAAGT     |
|                    | R2 | CATYCKBAYRAAYTCTKGYTGDYAGGCC      |
| <i>Actin</i>       | F1 | GARAARATGACNCARATHATGTTYGA        |
|                    | R1 | TTYCTDATRTCACRTRCAYTTCAT          |

Supplemental Table 2. Primers for *XES* RACE

| Plant species           | I. D.    | Sequence                     |
|-------------------------|----------|------------------------------|
| Petunia and Calibrachoa | GSP1     | CTTCAACAAGGGGGACAATTTCTAAACC |
|                         | GSP2     | CCGGATGTGCTATACCACGAAGTAAAC  |
|                         | 5'end-1F | AAATTTCTGCCCATTTTAAACAGC     |
|                         | 5'end-2F | TCAACAACTTTTGGGACCAATTTGC    |

Supplemental Table 3. Primers for RT-qPCR

| Target gene        | Direction | Sequence                     |
|--------------------|-----------|------------------------------|
| <i>DXS</i>         | Forward   | TTTAGTTGGTGCAGATGGTC         |
|                    | Reverse   | CAACCATGTGCATTAGCTCT         |
| <i>IPI</i>         | Forward   | GTCCCAGTTGACCAGTTCAC         |
|                    | Reverse   | TGTTCTCGGTTACGTATTT          |
| <i>GGPS1</i>       | Forward   | GCCTTGTATGGATAACGATG         |
|                    | Reverse   | CCCCTTTAGTTTGTGTAGCA         |
| <i>GGPS2</i>       | Forward   | GGAAGTGAAGGATTAGTCGC         |
|                    | Reverse   | GTTTTGCCACGTGATCATT          |
| <i>PSY1</i>        | Forward   | CCAGAGAGAAGAAGGGCTATC        |
|                    | Reverse   | TTCCCACCTATCTAATGCCAT        |
| <i>PSY2</i>        | Forward   | CAGGCTTTAGATAGGTGGGAG        |
|                    | Reverse   | TGAATGGCTGAATATCGACA         |
| <i>PDS</i>         | Forward   | ATAAACCCCTGACGAGCTTTC        |
|                    | Reverse   | CCACCTTTTGA CT CGATATG       |
| <i>Z-ISO</i>       | Forward   | GCAGGTGATATGGTGCTTAGCTCACA   |
|                    | Reverse   | ACTTCAAAGCCTCACCATGTCGTAG    |
| <i>ZDS</i>         | Forward   | ATAAAGGGGGTGATATAGGG         |
|                    | Reverse   | CGCCATCTGGATCTACTAAA         |
| <i>CRTISO</i>      | Forward   | GGTGGAGTTGGTGAGATTGCCA       |
|                    | Reverse   | GCTTCACTCCAACAGCTTTGCC       |
| <i>LCYB</i>        | Forward   | CTATGGATTTGTTGGATTGC         |
|                    | Reverse   | ACTTTAGCCTGGTGG AATTT        |
| <i>LCYE</i>        | Forward   | AAGATCTTGGGCTTCAAGC          |
|                    | Reverse   | CCTGACTCCACACACCTTTT         |
| <i>CHYB1</i>       | Forward   | CTCTTCCAGCCATAGCACTT         |
|                    | Reverse   | TAGTCCATCGTGAACGAACA         |
| <i>CHYB2</i>       | Forward   | GGTGGGCTCATAAAGCTCTA         |
|                    | Reverse   | AAGTCCAGTAGGGCTATTGC         |
| <i>CHYB/CYP97A</i> | Forward   | CATTAGACATCATTGGCAAAGCTGTA   |
|                    | Reverse   | CTTTCCAGATAGGTATCTCCCAA ACTG |
| <i>CHYE/CYP97C</i> | Forward   | ATGTTATTGGTCTTGCGCTCTTCA     |
|                    | Reverse   | ACAGATCAGTTGAACGGAGTTCTG     |
| <i>ZEP</i>         | Forward   | GCTGATGGCATAACGGTCTAA        |
|                    | Reverse   | AAGACGCGGTACCCAACT           |
| <i>CCD1</i>        | Forward   | GTTTACCTTTGGCTACGCTC         |
|                    | Reverse   | GGGAGATCCATCATAATTGC         |
| <i>CCD4a</i>       | Forward   | TGATGGAATGCTTCACTC           |
|                    | Reverse   | GGCAGTGAGACCGTTAAAAC         |
| <i>CCD4b</i>       | Forward   | ACTCGTGGAGCAGTGT CATT        |
|                    | Reverse   | GGGCTAATTTAATTGCAATA         |
| <i>NCED</i>        | Forward   | GAAGATGATGTGCCATACCA         |
|                    | Reverse   | TTCGGGTGAGCAATCATT           |
| <i>XES</i>         | Forward   | GGTATAGCACATCCGGCATTGTTTAC   |
|                    | Reverse   | AGCCATTCTGATGAATTCTGGTTGC    |
| <i>Actin</i>       | Forward   | TCTGGTGTGGTGTGAGTCA          |
|                    | Reverse   | GCAGTGGTGGTGAACATGTA         |

Supplemental Table 4. Similarity of cDNA sequences between petunia and calibrachoa

| Gene               | Similarity (%) | Length of compared cDNA (bp) |
|--------------------|----------------|------------------------------|
| <i>DXS</i>         | 92             | 964                          |
| <i>IPI</i>         | 96             | 280                          |
| <i>GGPS1</i>       | 94             | 521                          |
| <i>PSY1</i>        | 95             | 595                          |
| <i>PSY2</i>        | 96             | 596                          |
| <i>PDS</i>         | 98             | 951                          |
| <i>Z-ISO</i>       | 98             | 459                          |
| <i>ZDS</i>         | 97             | 842                          |
| <i>CRTISO</i>      | 96             | 897                          |
| <i>LCYB</i>        | 95             | 680                          |
| <i>LCYE</i>        | 92             | 392                          |
| <i>CHYB1</i>       | 96             | 532                          |
| <i>CHYB2</i>       | 94             | 530                          |
| <i>CHYB/CYP97A</i> | 96             | 993                          |
| <i>CHYE/CYP97C</i> | 95             | 1095                         |
| <i>ZEP</i>         | 96             | 683                          |
| <i>CCD1</i>        | 97             | 907                          |
| <i>CCD4a</i>       | 94             | 710                          |
| <i>NCED</i>        | 95             | 587                          |
| <i>XES</i>         | 91             | 2133                         |
| <i>Actin</i>       | 92             | 494                          |
